# Supplementary material for: Investigation on the surface-active and antimicrobial properties of a natural glycolipid product
Source: Royal Society of Chemistry journal article supplement (doi:10.1039/d1fo02359d), 2021-01-01

## SUPPORTING INFORMATION

### **Investigation on the surface-active and antimicrobial properties of a natural glycolipid product**

Meizhen Xie<sup>1</sup> §\*, Qing Song<sup>2</sup> §\* and Hong Zhao<sup>1</sup>

<sup>1</sup> School of Food Equipment Engineering and Science, Xi'an Jiaotong University, Xi'an 710049, China

<sup>2</sup> Frontiers Science Center for Flexible Electronics (FSCFE), Xi'an Institute of Flexible Electronics (IFE), Xi'an Institute of Biomedical Materials & Engineering (IBME), Northwestern Polytechnical University, Xi'an 710072, China

**\*Corresponding Author:**

Meizhen Xie — Phone: 86-29-82667814; E-mail: xiemz15@mail.xjtu.edu.cn.

Qing Song — Phone: 86-29-88431960; E-mail: iamqsong@nwpu.edu.cn.

Fig. S1 External standard curves of different glycolipids.

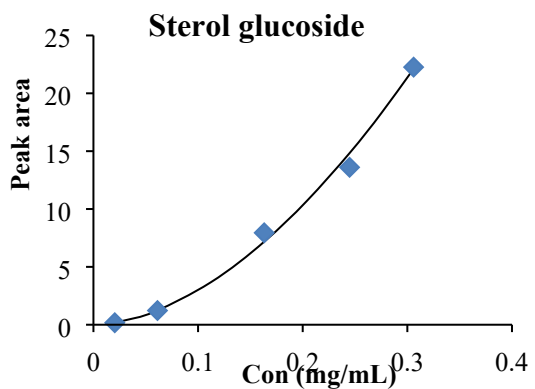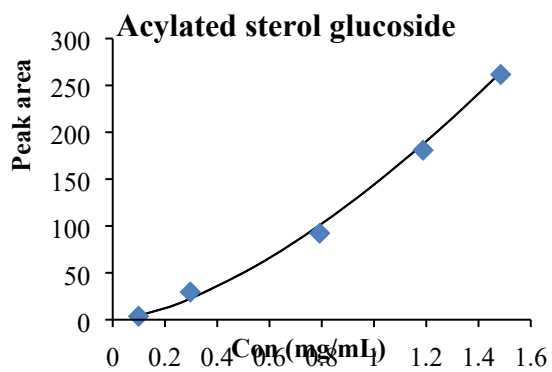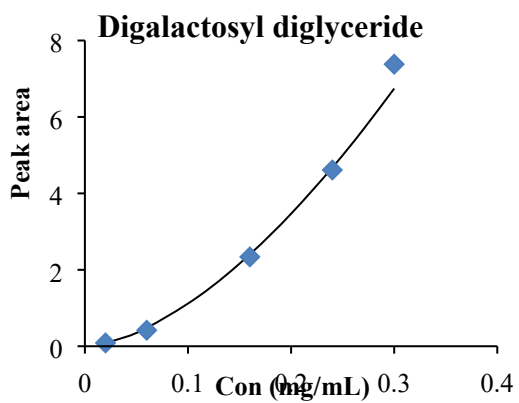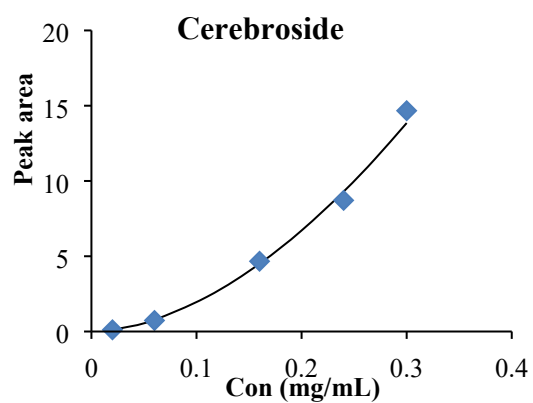

Supplement: d1fo02359d1.pdf [file d1fo02359d1.pdf]
